# Supplementary material for: Spray Dried Levodopa-Doped Powder Potentially for Intranasal Delivery
Source: MDPI journal article supplement (doi:10.3390/pharmaceutics14071384), 2022-06-30
Supplement: s1 [file s1]

# Supplementary Materials: Spray Dried Levodopa-doped Powder Potentially for Intranasal Delivery

Xuan Liu, Shen Yan, Mengyuan Li, Shengyu Zhang, Gang Guo, Quanyi Yin, Zhenbo Tong, Xiao Dong Chen and Winston Duo Wu

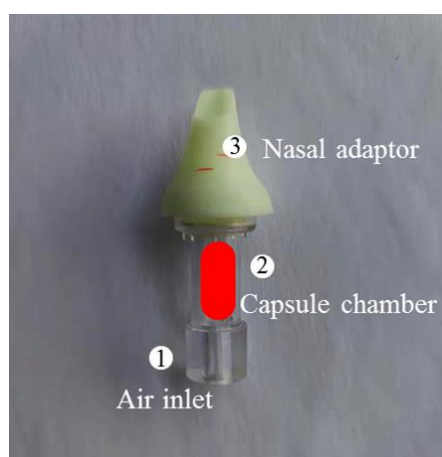

**Figure S1.** A simplified 3D-printed nasal powder delivery device to simulate the breath-powered Bi-Directional™ device 1-air inlet, 2-capsule chamber, 3-nasal adaptor.

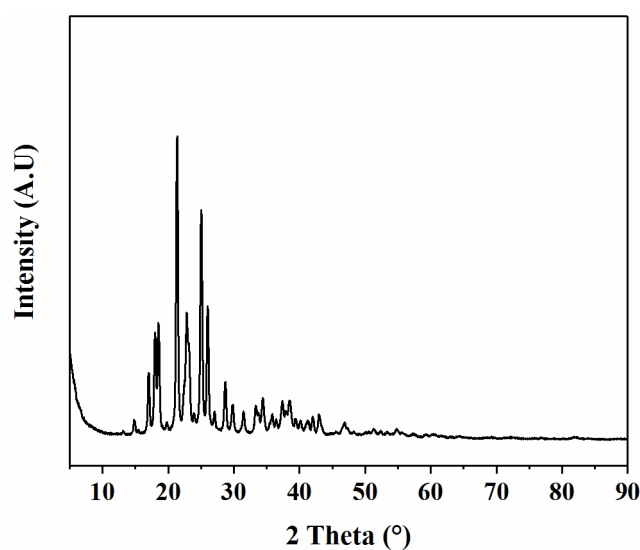

**Figure S2.** XRD patterns of the SD-L-dopa after storage.

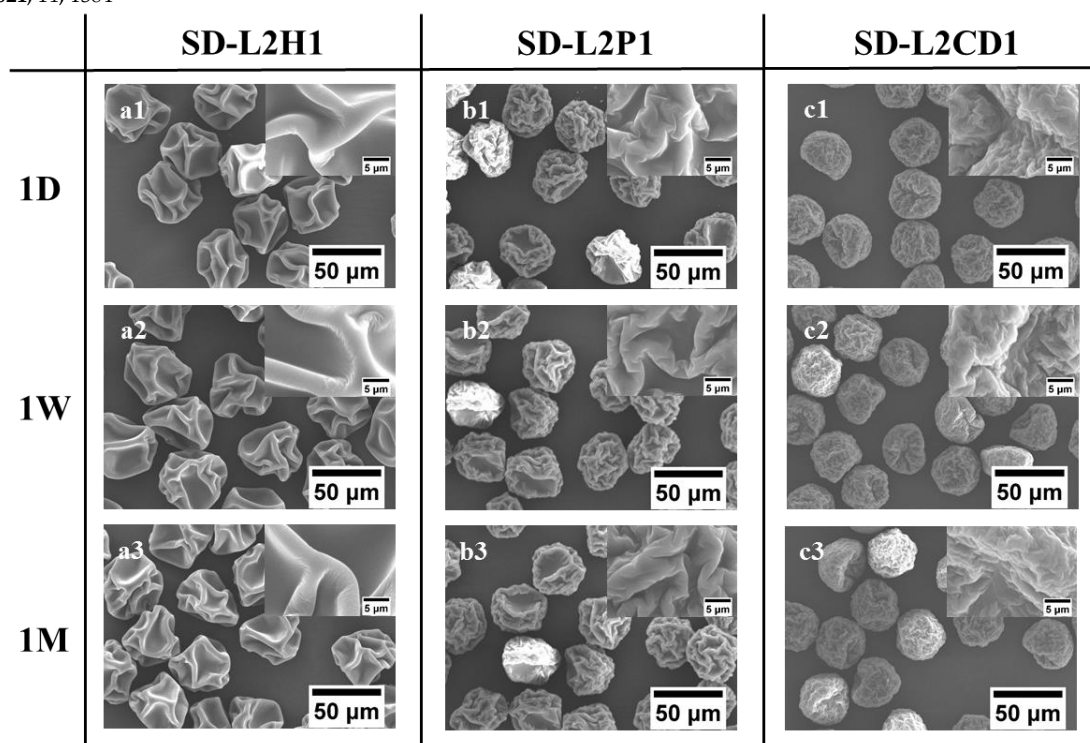

**Figure S3.** SEM images of SD samples after storage for different time: SD-L2H1 (a1-3); SD-L2P1 (b1-3) and SD-L2CD1 (c1-3) under the storage condition of 22 °C/18% RH for one day (1D, a1, b1 and c1), one week (1W, a2, b2 and c2) and one month (1M, a3, b3 and c3), respectively.

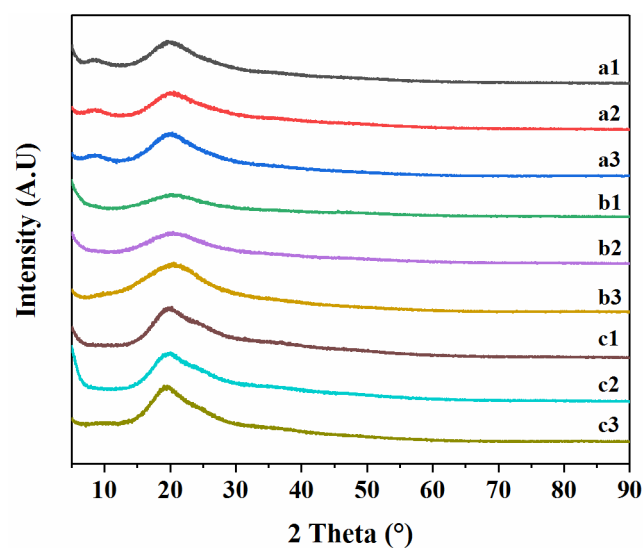

**Figure S4.** XRD patterns of SD samples after storage for different time: SD-L2H1 (a1-3); SD-L2P1 (b1-3) and SD-L2CD1 (c1-3) under the storage condition of 22 °C/18% RH for one day (a1, b1 and c1), one week (a2, b2 and c2) and one month (a3, b3 and c3), respectively.

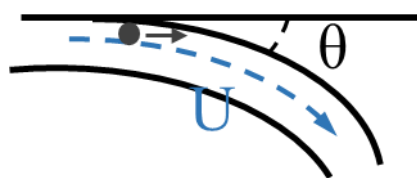

**Figure S5.** Schematic diagram of the inertial impaction process of particles.

**Table S1.** Emitted fraction and recovery fraction of SD-L1H2, -L1P2 and -L1CD2.

| Scheme   | Emitted Fraction (Total Dose %) | Recovery Fraction (Total Dose %) |
|----------|---------------------------------|----------------------------------|
| SD-L1H2  | 99.33 ± 0.26                    | 92.80 ± 6.01                     |
| SD-L1P2  | 99.38 ± 0.23                    | 88.24 ± 2.04                     |
| SD-L1CD2 | 99.50 ± 0.02                    | 90.56 ± 5.43                     |
